# Supplementary material
Source: publisher figshare collection journal article supplement (https://tandf.figshare.com/articles/dataset/_/21829215)
Supplement: Supplementary file 1 [file 1]

## Het gebruik van EMDR in positief verbaal materiaal; resultaten van een patiëntenstudie

Suzy Johanna Martina Adriana Matthijssen

**Achtergrond:** Bij ‘eye movement desensitization and reprocessing’ (EMDR) verminderen volgens de werkgeheugentheorie duale taken die het werkgeheugen belasten terwijl een herinnering wordt opgehaald de levendigheid en emotionaliteit van de herinnering tijdens toekomstige ophalingen van de herinnering wanneer er geen duale taak wordt uitgevoerd. Er is enig bewijs dat belasting van het werkgeheugen ook de levendigheid en emotionaliteit van auditieve of verbale beelden vermindert.

**Doel:** De huidige studie onderzoekt het effect van oogbewegingen op positief verbaal materiaal (verbale beelden), wat gebruikt wordt in verschillende onderdelen van het EMDR protocol. In de Nederlandse versie van het standaard EMDR protocol wordt een procedure uitgevoerd genaamd ‘positief afsluiten’, waarbij verbale beelden worden gebruikt terwijl oogbewegingen worden uitgevoerd. De waarde van de oogbewegingen in deze procedure is echter nooit aangetoond en volgens de werkgeheugentheorie zouden deze contraproductief zijn. Twee eerdere studies met studenten, die een vergelijkbare opzet hebben als de huidige studie, laten geen toegevoegde waarde van de oogbewegingen in deze procedure zien, maar ook geen negatief effect.

**Methoden:** zesentwintig patiënten scoorden de overtuiging van het bezitten van twee positieve persoonlijke eigenschappen en de emotionaliteit van de eigenschappen. Vervolgens kregen ze een EMDR sessie gericht op een negatieve herinnering, waarna ze de positieve eigenschappen opnieuw ophaalden en scoorden op overtuiging en emotionaliteit. Vervolgens haalden ze de ene eigenschap op terwijl ze een duale taak uitvoerden (oogbewegingen) en de andere eigenschap zonder duale taak. Hierna scoorden ze nogmaals de overtuiging en emotionaliteit van de eigenschappen.

**Resultaten:** oogbewegingen hadden geen effect op de overtuiging van het bezitten van een bepaalde eigenschap, noch op de emotionaliteit. Secundaire analyses laten zien dat een effectieve EMDR sessie zelf de overtuiging van het bezitten van een bepaalde eigenschap versterkt vergeleken met minder of niet effectieve EMDR-sessies.

**Conclusie:** Oogbewegingen zijn niet effectief in het bevorderen van de overtuiging van het bezitten van een positieve persoonlijke eigenschap of de emotionaliteit ervan. Wanneer de resultaten gerepliceerd worden door andere patiëntenstudies suggereert dit eliminatie van de procedure ‘positief afsluiten.’

EMDR; werkgeheugentheorie; positief verbaal materiaal; verbale beelden; positief afsluiten; modaliteitsspecifiek belasten; oogbewegingen

**Citation:** European Journal of Psychotraumatology 2016, 7: 30119 - <http://dx.doi.org/10.3402/ejpt.v7.30119>
