# Supplementary material
Source: publisher figshare collection journal article supplement (https://tandf.figshare.com/articles/dataset/_/21829215)
Supplement: Supplementary file 2 [file 1]

## Procedura EMDR z wykorzystaniem pozytywnego materiału werbalnego: wyniki studium przypadku

Suzy Matthijssen, Marcel van den Hout

**Wprowadzenie:** teoria pamięci roboczej wyjaśnia skuteczność metody odwracania i przetwarzania za pomocą ruchów gałek ocznych. Istnieje też wiele badań potwierdzających rolę pamięci roboczej w redukcji poziomu komponenty emocjonalnej przywoływanych, traumatycznych wspomnień.

**Cel:** Celem niniejszego badania było zbadanie efektywności metody odwracania i przetwarzania za pomocą ruchów gałek ocznych z wykorzystaniem pozytywnego materiału werbalnego. Wykorzystano Duńską wersję protokołu metody EMDR.

**Metoda:** Zbadano 36 pacjentów, na początku w kontekście wybranych cech osobowości, oraz oszacowania emocjonalności tych cech. Następnie badani byli poddawani procedurze EMDR.

**Wyniki:** Oceniana emocjonalność cech osobowości nie wpływała na przekonanie o posiadaniu tych cech przez badanych. Sama procedura EMDR zwiększała efektywność przetwarzania pozytywnego materiału.

**Konkluzje:** Oceniana emocjonalność cech osobowości nie wpływa na przekonanie o posiadaniu tych cech przez badanych.

**Słowa kluczowe:** EMDR, pamięć robocza, pozytywny materiał werbalny, wyobrażenia werbalne modalność, ruchy gałek ocznych.

**Keywords:**

**Name of translator:** Marcin Rzeszutek, University of Finance and Management in Warsaw, Poland

**Citation:** European Journal of Psychotraumatology 2016, 7: 30119 - <http://dx.doi.org/10.3402/ejpt.v7.30119>
