# Supplementary material
Source: publisher figshare collection journal article supplement (https://tandf.figshare.com/articles/dataset/_/21829215)
Supplement: Supplementary file 3 [file 1]

## **Pozitif sözel materyalde EMDR kullanımı: Bir hasta çalışmasından sonuçlar**

Suzy Matthijssen, Marcel van den Hout

Arkaplan: Göz Hareketleriyle Duyarsızlaştırma ve Yeniden İşleme (EMDR)'ın Çalışan bellek teorisine göre, anıyı tekrar hatırlama boyunca çalışan belleğe sorumluluk verilen ikili görev imajın canlılığını ve anının duygusallığını ikili görevin olmadığı gelecek tekrar hatırlama süresince azaltmaktadır. Çalışan bellek yükünün işitsel ya da sözel imajın canlılığını ve duygusallığını azalttığına dair kanıtlar da bulunmaktadır. Amaç: Bu çalışma göz hareketlerinin (EM) EMDR protokolünün farklı parçalarında kullanılan pozitif sözel materyal (sözel imajın) üzerindeki etkisini test etmektedir. EMDR standart protokolünün Felemenkçe versiyonunda ikili görev durumunda (EM) sözel imajın yürütüldüğü 'Positive Closure' (PC) adlı bir prosedür yürütülmektedir. Bu prosedürde yer alan EM'in değeri henüz kurulmamıştır ve çalışan bellek hesabına göre engelleyici olacaktır. Daha önce yürütülen üniversite öğrencileri ile yürütülen iki çalışma, şu an kurulan ile karşılaştırılırsa, prosedürdeki EM'in değerine ek bir değer göstermemiş olmakla birlikte karşıt bir etki de göstermemiştir. Yöntem. 36 hasta iki pozitif kişilik özelliğini ve özelliklerin duygusallığına dair inançlarını oyladılar. Daha sonra negatif bir anıyı belirleyip hatırladıkları ve sonrasında tekrar inançlarını ve duygusallıklarını oyladıkları bir EMDR seansına katıldılar. Sonra ikili görev ile uğraşırken (EM) bir özellik ve ikili görev yokken diğer özelliği hatırladılar. Bunlardan sonra, inancı ve duygusallıklarını tekrar oyladılar. EM bir özelliğe sahip olduğu inancını ya da duygusallığı etkilemedi. İkinci analiz etkili bir EMDR seansı göstererek özelliklere sahip olduğuna dair inancı daha az etkili ya da etkisiz EMDR seanslarına göre kuvvetlendirdi. Tartışma. EM kişilik özelliklerine sahip olduğuna dair olan inancı ya da duygusallığı kuvvetlendirmede etkili değildir. Eğer diğer hasta çalışmalarıyla değiştirilirse, bu PC prosedürünün kaldırılması ileri sürülebilir. Keywords: EMDR, çalışan bellek teorisi, sözel imajın, positive closure, yönteme özel yükleme, göz hareketleri

Name of translator: Seray Akça

Citation: European Journal of Psychotraumatology 2016, 7: 30119 - <http://dx.doi.org/10.3402/ejpt.v7.30119>
