# Supplementary material
Source: publisher figshare collection journal article supplement (https://tandf.figshare.com/articles/dataset/_/21829215)
Supplement: Supplementary file 4 [file 1]

## **Применение EMDR в позитивном вербальном материале: Результаты изучения пациентов**

Suzy Matthijssen, Marcel van den Hout  
Сюзи Матиссен, Марсель ван ден Хаут

Исходная информация. Согласно теории Рабочей памяти (РП) теории Переработки и десентизации движением глаз (EMDR), двойные задачи которые нагружают РП при процессе вспоминания, снижают яркость и эмоциональность воспоминаний при последующем вспоминании, когда РП уже не загружено двойной задачей. Существуют научные доказательства того, что двойная задача (нагрузка) рабочей памяти также снижает яркость и эмоциональность слуховых и вербальных образов.

Задача. Данное исследование проверяет эффект движения глаз (ДГ) на позитивный вербальный материал (вербальные образы), который применяется в различных частях протокола EMDR. В голландской версии стандартного протокола EMDR осуществляется процедура "позитивного завершения" (ПЗ), которая использует вербальные образы при кондиции двойной задачи (ДГ). Значение ДГ при данной процедуре не изучалась и согласно теории РП, самоотчет в данном случае может быть контр-продуктивным. Два предыдущих исследования проведенных со студентами в ситуации дающей возможность сравнения с данным исследованием, показали что движение глаз в данной процедуре не играет ни позитивной, ни негативной роли.

Метод. Тридцать шесть пациентов оценили веру в наличие у них двух позитивных личностных качеств и эмоциональность (эмоциональное значение) данных качеств. После этого им провели сессию EMDR нацеленную на негативное воспоминание, по окончании которой они вновь оценили веру о наличии у себя двух позитивных личностных качеств и их эмоциональность. После этого они вспомнили одно качество при кондиции двойной задачи (ДГ) и другое качество без ДГ. После этого они вновь оценили веру и эмоциональность.

Результаты. ДГ не повлияло на веру и эмоциональность. Вторичный анализ показывает что эффективная сессия EMDR сама по себе повышает веру в наличие качеств по сравнению с менее- или неэффективной сессией EMDR.

Выводы. ДГ не является эффективным средством повышения веры в наличие личностного качества или эмоциональности по отношению к нему. Если данная находка подтвердится и другими исследованиями, это может послужить основанием для отмены процедуры позитивного завершения.

Keywords: EMDR, теория рабочей памяти, позитивный словесный материал, словесные изображения, позитивное завершение, нагрузка специфичная модальности, движение глаз.

Name of translator: Jana Darejan Javakhishvili  
Имя переводчика: Джана Дареджан Джавахишвили
