# Supplementary material
Source: publisher figshare collection journal article supplement (https://tandf.figshare.com/articles/dataset/_/21829215)
Supplement: Supplementary file 5 [file 1]

## EMDR 在积极语言材料中应用：一项患者研究结果

Suzy Matthijssen, Marcel van den Hout

背景：根据眼动脱敏与再加工（EMDR）的工作记忆（WM）理论，双任务使得记忆回忆中的工作记忆负担加重，减少了未来没有双任务状态下想象的生动性和记忆的情感性。有一些证据表明工作记忆负担加重也能减少听觉或言语想象的生动性与情感性。

目的：本研究测试了眼动（EM）在积极语言材料（语言想象）的有效性，语言想像被应用于 EMDR 方案的不同部分。在丹麦版标准 EMDR 方案中有一项“积极结束”（PC）程序，该程序采用双任务条件（眼动）下的语言想象。眼动在这个程序中的价值并没有确定，而根据工作记忆理论来解释作用可能是适得其反。2 项更早的有关本科生的研究显示在这个程序中眼动没有附加作用，但也没有适得其反的效果。

方法：36 名患者接受了 2 项积极人格特质以及情绪特质信念的评估。然后接受了 EMDR 治疗，本次治疗针对负性记忆及回忆，治疗后再次评估了信念和情绪特质。其后他们在双任务下回忆了一项特质，以及在无任务下回忆另外一项特质。其后，他们再评了信念和情绪。

结果：眼动不影响对特质或情绪的信念。次级分析显示，与效果较小或无效 EMDR 治疗相比，有效的 EMDR 疗程本身能提高特质的信念。

结论：眼动不能提高个人特质或情感进程的信念。如果其他患者研究能够重复该结果，可能提示可以取消“积极结束”程序。

Keywords: EMDR, 工作记忆理论，积极语言材料，语言想象，积极结束，感觉通道特异性负担，眼动

Name of translator: Xiwen Hu

Citation: European Journal of Psychotraumatology 2016, 7: 30119 - <http://dx.doi.org/10.3402/ejpt.v7.30119>
